## Original Research Article

# Long-term exposure to air-pollution and COVID-19 mortality in England: a hierarchical spatial analysis

Garyfallos Konstantinoudis,<sup>1</sup> Tullia Padellini,<sup>1</sup> James Bennett,<sup>1</sup> Bethan Davies,<sup>1</sup> Majid Ezzati,<sup>1</sup> Marta Blangiardo<sup>1</sup>

### Affiliations:

1 MRC Centre for Environment and Health, Department of Epidemiology and Biostatistics, School of Public Health, Imperial College London, London, UK

### Corresponding author:

Garyfallos Konstantinoudis, MRC Centre for Environment and Health, Department of Epidemiology and Biostatistics, School of Public Health, Imperial College London, London, UK

E-mail: [g.konstantinoudis@imperial.ac.uk](mailto:g.konstantinoudis@imperial.ac.uk)

**Keywords:** SARS-CoV-2, Mortality, Nitrogen dioxide, Particular Matter, Air-pollution, Bayesian spatial model

1 **Summary**

2 **Background** Recent studies suggested a link between long-term exposure to air-pollution and  
3 COVID-19 mortality. However, due to their ecological design, based on large spatial units,  
4 they neglect the strong localised air-pollution patterns, and potentially lead to inadequate  
5 confounding adjustment. We investigated the effect of long-term exposure to NO<sub>2</sub> and PM<sub>2.5</sub>  
6 on COVID-19 deaths up to June 30, 2020 in England using high geographical resolution.

7 **Methods** We included 38 573 COVID-19 deaths up to June 30, 2020 at the Lower Layer  
8 Super Output Area level in England (n=32 844 small areas). We retrieved averaged NO<sub>2</sub> and  
9 PM<sub>2.5</sub> concentration during 2014-2018 from the Pollution Climate Mapping. We used  
10 Bayesian hierarchical models to quantify the effect of air-pollution while adjusting for a series  
11 of confounding and spatial autocorrelation.

12 **Findings** We find a 0.5% (95% credible interval: -0.2%-1.2%) and 1.4% (-2.1%-5.1%)  
13 increase in COVID-19 mortality rate for every 1µg/m<sup>3</sup> increase in NO<sub>2</sub> and PM<sub>2.5</sub>  
14 respectively, after adjusting for confounding and spatial autocorrelation. This corresponds to a  
15 posterior probability of a positive effect of 0.93 and 0.78 respectively. The spatial relative risk  
16 at LSOA level revealed strong patterns, similar for the different pollutants. This potentially  
17 captures the spread of the disease during the first wave of the epidemic.

18 **Interpretation** Our study provides some evidence of an effect of long-term NO<sub>2</sub> exposure on  
19 COVID-19 mortality, while the effect of PM<sub>2.5</sub> remains more uncertain.

20 **Funding** Medical Research Council, Wellcome Trust, Environmental Protection Agency and  
21 National Institutes of Health.

22

23

24

25

26

## 1 **Introduction**

2 As of 30<sup>th</sup> of June 2020, COVID-19 has caused more than 500 000 deaths globally, with an  
3 estimated case fatality of 1-4%.<sup>1</sup> The UK is one of the countries most affected, with the an  
4 estimated 49 200 (44 700-53 300) more deaths than it would be expected from mid-February  
5 to 8<sup>th</sup> May 2020 had the pandemic not taken place.<sup>2</sup> Established risk factors of COVID-19  
6 mortality include age, sex and ethnicity.<sup>3</sup> Previous studies have observed a correlation  
7 between pre-existing conditions such as stroke, hypertension and diabetes.<sup>4,5</sup> Long-term  
8 exposure to air-pollution has been hypothesised to worsen COVID-19 prognosis: either  
9 directly, as it can suppress early immune responses to the infection,<sup>6</sup> or indirectly, as it can  
10 increase the risk of stroke, hypertension and other pre-existing conditions.<sup>7,8</sup>

11 Little is known about the effect of long-term exposure to air-pollution on COVID-19  
12 mortality and evidence so far relies on ecological studies based on large areas. A study in the  
13 US, at county level, reported an 8% (95% confidence intervals: 2%-15%) increase in the  
14 COVID-19 death rate, for an increase of 1 $\mu$ g/m<sup>3</sup> in the long-term exposure to PM<sub>2.5</sub>  
15 (atmospheric particulate matter that has a diameter of less than 2.5 micrometers).<sup>6</sup> Another  
16 study in the US, at county level, examined the long-term effect of NO<sub>2</sub>, PM<sub>2.5</sub> and O<sub>3</sub> on  
17 COVID-19 case fatality (proportion of deaths among infected) and mortality rate and reported  
18 a 7.1% (1.2%-13.4%) and 11.2% (3.4%-19.5%) increase per 4.5ppb increase in NO<sub>2</sub> for case  
19 fatality and mortality rate respectively.<sup>9</sup> The same study reported weak evidence of an  
20 association between COVID-19 case fatality or mortality with long term exposure to PM<sub>2.5</sub>  
21 and O<sub>3</sub>. A study in the Netherlands using municipalities reported that every unit increase in  
22 the long-term exposure to PM<sub>2.5</sub>, NO<sub>2</sub> and SO<sub>2</sub> was associated with 0.35, 2.3 and 1.8  
23 additional COVID-19 deaths respectively.<sup>10</sup> A study in England reported a significant  
24 association between long-term exposure to NO<sub>2</sub>, NO and O<sub>3</sub> and COVID-19 deaths at Lower  
25 Tier Local Authorities (LTLA).<sup>11</sup>

26 Several methodological shortcomings limit the interpretability of previous studies:

1 1) They were based on data aggregated on large spatial units and thus suffer from ecological  
2 fallacy (grouped levels association do not reflect individual ones).<sup>12</sup>

3 2) Air pollution is characterised by high spatial variability, making the availability of  
4 mortality data at the same high spatial resolution crucial. In addition, a coarse geographical  
5 resolution might lead to inadequate adjustment for confounders, when these are available at  
6 higher resolution.

7 3) Most previous studies assessed cumulative deaths until mid or end of April and thus the  
8 generalisability of the results is limited to the early stages of the epidemic.<sup>6,9,11</sup> Only one study  
9 had data available up to 5<sup>th</sup> June 2020 capturing almost the entire first wave.<sup>10</sup>

10 In this nationwide study in England, we investigated the effect of long-term exposure to air  
11 pollution on COVID-19 mortality during the entire first wave of the epidemic, after  
12 accounting for confounding and spatial autocorrelation. We focused on exposure to NO<sub>2</sub> and  
13 PM<sub>2.5</sub>. We downscaled the LTLA geographical information to the Lower Layer Super Output  
14 Area (LSOA) to alleviate the effect of ecological bias and exploit the variability of the  
15 exposure at high geographical resolution. We hypothesise that long-term exposure to these  
16 compounds worsens the prognosis of COVID-19 patients, as exposure to pollution can  
17 suppress early immune responses to the infection, leading to later increases in inflammation<sup>6</sup>  
18 and as it can affect the onset of pre-existing conditions.<sup>13-16</sup>

## 19 **Methods**

### 20 **Study population**

21 We included all COVID-19 deaths up to June 30, 2020 in England as retrieved from Public  
22 Health England (PHE). For each death, PHE records individual data on age, sex and ethnicity,  
23 as well as the LTLA of the residential address. Information for the general population about  
24 age and sex is available from the Office of National Statistics (ONS) for 2018, whereas  
25 ethnicity is obtained from the 2011 census at the LSOA level.

1 We downscaled the LTLA geographical information to the LSOA level using census based  
2 weights to match the age, sex and ethnic composition of the deaths in each LTLA with that of  
3 the corresponding LSOAs. For more information about the downscaling procedure see  
4 Supplementary Material S1.1.

## 5 **Exposure**

6 We considered exposure to NO<sub>2</sub> and PM<sub>2.5</sub> as indicators of air pollution. We selected these  
7 pollutants because: 1) they reflect different sources of air-pollution (NO<sub>2</sub> reflects traffic  
8 related air-pollution, whereas PM<sub>2.5</sub> is a combination of traffic and non-traffic sources), 2)  
9 they were considered in previous studies<sup>6,9-11</sup> and 3) they are responsible for the highest  
10 number of years of life lost compared to other pollutants in Europe.<sup>17</sup> We retrieved NO<sub>2</sub> and  
11 PM<sub>2.5</sub> concentration in England from the Pollution Climate Mapping (PCM; [https://uk-  
12 air.defra.gov.uk/](https://uk-air.defra.gov.uk/)). The PCM produces annual estimates during 2001-2018 for NO<sub>2</sub> and 2002-  
13 2018 for PM<sub>2.5</sub> at 1x1km resolution for the UK. The PCM model is calibrated using  
14 monitoring stations across the nation and has high predictive accuracy, R<sup>2</sup> =0.88 for NO<sub>2</sub> and  
15 R<sup>2</sup> = 0.63 for PM<sub>2.5</sub>.<sup>18</sup> We defined long-term exposure to these compounds as the mean of the  
16 past 5 years for which data was available, i.e. 2014-2018. We weighted the exposure using a  
17 combination of population estimates available from the fourth version of Gridded Population  
18 of the World (GPW) collection at 1x1km grid as of 2020<sup>19</sup> and from ONS at LSOA level as of  
19 2018. For more information about the population weights see Supplementary Material S1.2.

## 20 **Confounders**

21 We considered confounders related with meteorology, socio-demographics, disease spread,  
22 healthcare provision and health related variables (Table 1). As meteorological confounders,  
23 we considered temperature and relative humidity and calculated the mean for March-June  
24 2018 as this is the latest year with data available at 1x1km grid retrieved from the MetOffice.  
25 We weighted temperature and relative humidity using the population weights calculated for  
26 the air-pollution exposure. As socio-demographical confounders we considered age, sex,

1 ethnicity, deprivation, urbanicity, population density and occupation. Information on age  
2 (2018), sex (2018), ethnicity (2011), urbanicity (2011) and population density (2018) was  
3 available at the LSOA level from ONS. To adjust for deprivation, we used quintiles of the  
4 index of multiple deprivation at LSOA level in 2011 (Ministry of Housing, Communities and  
5 Local Government), excluding the dimension related to air quality. We used estimates of  
6 occupational exposures to COVID-19, as calculated by ONS, to adjust for high risk exposure  
7 to COVID-19, defined as those with a score higher than 80/100 (corresponding to at least >1  
8 per week exposed to someone infected, Supplementary Material S1.3 and Table S1). To  
9 account for disease progression, we used the number of days since the 1st reported case and  
10 the number of positive cases in each LTLA (as of 30<sup>th</sup> of June, as retrieved from PHE). For  
11 healthcare provision, we used the number of intensive care unit beds per population, in  
12 February 2020 per NHS trust, as retrieved by NHS. Last, as health-related variables, we  
13 considered smoking and obesity prevalence at the GP practice level during 2018-2019, as  
14 retrieved by PHE (Supplementary Material S1.3).

## 15 **Statistical methods**

16 We specified Bayesian hierarchical Poisson log-linear models to investigate the association of  
17 COVID-19 deaths and NO<sub>2</sub> and PM<sub>2.5</sub> independently. Spatial autocorrelation was modelled  
18 using a re-parametrisation of the Besag-York-Mollié conditional autoregressive prior  
19 distribution.<sup>20,21</sup> We fitted four models including: 1) each pollutant (model 1), 2) each  
20 pollutant and the spatial autocorrelation term (model 2), 3) each pollutant and all confounders  
21 (model 3) and 4) each pollutant, the spatial autocorrelation term and all confounders (model  
22 4). All models were adjusted for age, sex and ethnicity using indirect standardisation. In order  
23 to propagate the uncertainty resulted from the sampling we used for the downscaling  
24 (Supplementary Material S1.1), we fitted the models over 100 downscaled samples and then  
25 performed Bayesian model averaging to combine the estimates.<sup>22</sup> We report results as  
26 posterior median of mortality relative risk for every 1µg/m<sup>3</sup> increase in the air-pollutants, 95%

1 credibility intervals (CrI) and posterior probability that the estimated effect is positive. We  
2 also report posterior median of spatial mortality relative risks (exponential of the spatial  
3 autocorrelation term) and posterior probabilities that the spatial relative risks are larger than 1.  
4 The full model and prior specifications are given in the Supplementary Material S1.4.  
5 All models are fitted in INLA.<sup>23</sup> Data and code are available on github  
6 (<https://github.com/gkonstantinoudis/COVID19AirpollutionEn>).

## 7 **Sensitivity analyses**

8 We performed a series of sensitivity analyses. First, we repeated the main analyses using data  
9 at the LTLA level with all exposures and confounding weighted by population. Second, we  
10 examined if there is a differential effect of long-term exposure to air-pollution at the early  
11 stages of the epidemic, considering the lockdown (23<sup>rd</sup> of March 2020) as a landmark. Third,  
12 we assessed the correlation between the latent field of the full model (model 4) with that of  
13 the model excluding or including only covariates indicating disease spread (i.e. number of  
14 tested positive cases and days since first reported cases). Fourth, we categorised pollutants  
15 into quintiles to allow more flexible fits. Fifth, we repeated the analysis using suspected cases  
16 as the outcome.

## 17 **Results**

### 18 **Study Population**

19 We identified 38 573 COVID-19 deaths with a laboratory confirmed test in England between  
20 2<sup>nd</sup> March and 30<sup>th</sup> June (Figure 1). The age, sex and ethnicity distribution of the deaths  
21 follows patterns reported previously (Supplementary Material Tables S2-3).

## 1 **Exposure**

2 Figure 2 shows the population weighted air-pollutants at LSOA level in England. We observe  
3 that the localised variation of NO<sub>2</sub>, for instance due to the highways, is adequately captured at  
4 the spatial resolution of the LSOAs. The mean of NO<sub>2</sub> is 16.17µg/m<sup>3</sup> and it varies from  
5 2.99µg/m<sup>3</sup> in highly rural areas to 50.69µg/m<sup>3</sup> in the big urban centres (Figure 2). The mean of  
6 PM<sub>2.5</sub> is 9.84µg/m<sup>3</sup> with a smaller variation, 5.14-14.22 µg/m<sup>3</sup> (Figure 2).

## 7 **Confounders**

8 Plots and maps of the confounders can be found in Supplementary Material, Figures S1-11.

## 9 **NO<sub>2</sub>**

10 We observe a 2.6% (95%CrI: 2.4%-2.7%) increase in the COVID-19 mortality rate for every  
11 1µg/m<sup>3</sup> increase in the long-term exposure to NO<sub>2</sub>, based on model 1 (Figure 3 &  
12 Supplementary Material Table S4). There is still evidence of an effect, albeit smaller, once we  
13 adjust for spatial autocorrelation or confounders, with increases in the long-term exposure to  
14 NO<sub>2</sub> of, respectively, 1.3% (0.8% - 1.8%), 1.8% (1.5% - 2.1%) for every 1µg/m<sup>3</sup>. When we  
15 adjust for both autocorrelation and confounders the evidence is less strong, with estimates of  
16 0.5% (-0.2% - 1.2%) for every 1µg/m<sup>3</sup> (Figure 3 & Supplementary Material Table S4) and  
17 posterior probability of a positive effect reaching 0.93. The spatial relative risk in England  
18 varies from 0.24 (0.08-0.69) to 2.09 (1.30-3.11) in model 2 and from 0.30 (0.10-0.84) to 1.87  
19 (1.18-2.93) in model 4, implying that the confounders explain very little of the observed  
20 variation (Figure 3). The variation is more pronounced in the cities and suburban areas (with  
21 posterior probability higher than 1; Figure 3).

## 22 **PM<sub>2.5</sub>**

23 We observe a 4.4% (3.7%-5.1%) increase in the mortality rate for every 1µg/m<sup>3</sup> increase in  
24 the long-term exposure to PM<sub>2.5</sub>, based on model 1 (Figure 3 & Supplementary Material Table  
25 S5). When we adjust for spatial autocorrelation the effect increases slightly but the credibility  
26 intervals are wider, 5.4% (2.5%-8.4%), whereas it is similar when we adjust for confounding



1 4.9% (3.7%-6.2%) (Figure 3 & Supplementary Material Table S5). The effect is weak when  
2 we account for confounders and spatial autocorrelation 1.4% (-2.1%-5.1%) (Figure 3 &  
3 Supplementary Material Table S5). The posterior probability of a positive effect is lower than  
4 observed for NO<sub>2</sub>, and equal to 0.78. The spatial relative risk follows similar patterns as the  
5 one reported in the models for NO<sub>2</sub>, with the posterior median relative risk varying from 0.24  
6 (0.12-0.46) to 2.26 (1.32-3.85) in model 2 and from 0.30 (0.15-0.57) to 1.90 (1.14-3.17) in  
7 model 4 (Supplementary Material Figure S12).

### 8 **Sensitivity Analyses**

9 When LTLAs are the main geographical unit for analysis, the results are consistent, but higher  
10 in magnitude, potentially due to inadequate covariate and spatial autocorrelation adjustment  
11 due to the coarse geographical resolution (Supplementary Material Tables S6-7, Figures S13-  
12 14). Restricting the study period to March 23, 2020 (N=698) also results in similar estimates  
13 for both pollutants, however the uncertainty is higher (Supplementary Material Tables S8-9,  
14 Figures S15-16). The latent field of model 4, with NO<sub>2</sub> as the pollutant, is similar to the latent  
15 fields of the models with and without the disease progression variables, with a correlation  
16 coefficient of 0.94 and 0.93 respectively (Supplementary Material Figure S17). The use of  
17 quintiles of the pollutants justifies the linearity assumption (Supplementary Material Figure  
18 S18). Finally, the results are consistent, but the evidence weaker, when suspected COVID-19  
19 deaths are used instead (Supplementary Material Tables S10-11, Figures S19-20).

### 20 **Post-hoc analysis**

21 In a post-hoc analysis we investigated if the evidence of an effect of NO<sub>2</sub> on COVID-19  
22 mortality can be attributed to pre-existing conditions. We selected hypertension, chronic  
23 obstructive pulmonary disease (COPD) and diabetes, because of 1) indications of previous  
24 literature that they increase the COVID-19 mortality risk,<sup>4,5</sup> 2) previous literature that suggest  
25 an effect with long-term exposure NO<sub>2</sub><sup>14-16</sup> and 3) data availability. We retrieved prevalence  
26 data for these pre-existing conditions from PHE available at the GP practice level during

1 2018-2019 (<https://fingertips.phe.org.uk/>), Supplementary Material Figures S21-23. The  
2 effect of NO<sub>2</sub> remain similar, 0.6% (-0.1% - 1.3%) with the posterior probability being 0.94  
3 whereas the spatial relative risk highlights the same geographical locations, Supplementary  
4 Material Figure S24.

## 5 **Discussion**

### 6 **Main findings**

7 This is the first nationwide study in England investigating the effect of long-term exposure to  
8 NO<sub>2</sub> and PM<sub>2.5</sub> during 2014-2018 on COVID-19 mortality at LSOA level. The unadjusted  
9 models indicate that for every 1µg/m<sup>3</sup> increase in the long-term exposure to NO<sub>2</sub> and PM<sub>2.5</sub> the  
10 COVID-19 mortality rates increase. After considering the effect of confounding and spatial  
11 autocorrelation the evidence is less strong for NO<sub>2</sub>, while for PM<sub>2.5</sub> there is larger uncertainty.  
12 The spatial relative risk has strong spatial patterns, identical for the different pollutants,  
13 potentially highlighting the effect of disease spread.

### 14 **Comparison with previous studies focusing on NO<sub>2</sub>**

15 Our study is comparable with three previous studies in the US, England and the Netherlands  
16 assessing the long-term effect of NO<sub>2</sub> in COVID-19 mortality. The study in the US focused  
17 on deaths reported by April 29, 2020, using 3 122 counties. For the exposure, they calculated  
18 the mean of daily concentrations during 2010-2016 as modelled by a previously described  
19 ensemble machine learning model ( $R^2=0.79$ ).<sup>25</sup> They reported a 7.1% (1.2%-13.4%) increase  
20 in mortality per 4.5ppb (1ppb=1.25µg/m<sup>3</sup>) increase in NO<sub>2</sub> after adjusting for confounders and  
21 spatial autocorrelation<sup>9</sup> (that is approximately 1.3% increase per 1 µg/m<sup>3</sup>). The study in  
22 England, with partly overlapping data as in our analysis, also reported a significant  
23 association between NO<sub>2</sub> and COVID-19 mortality (p<0.05). For the analysis they focused on  
24 COVID-19 deaths reported in England up to April 10, 2020, used 317 LTLAs, and did not  
25 account for spatial autocorrelation.<sup>11</sup> The study in the Netherlands using 335 municipalities  
26 and mean exposure during 2015-2019 reported 0.35 (0.04-0.66) additional COVID-19 deaths

1 for every  $1\mu\text{g}/\text{m}^3$  increase in  $\text{NO}_2$  after adjusting for confounders and certain spatial controls,  
2 such as transmission beyond the Dutch national borders<sup>10</sup>. Since the mean number of deaths in  
3 their sample is 16·86, the above estimate translates to a 2·0% increase in the COVID-19  
4 mortality for every  $1\mu\text{g}/\text{m}^3$  increase in  $\text{NO}_2$ .

## 5 **Comparison with previous studies focusing on $\text{PM}_{2.5}$**

6 Our study is comparable with previous studies assessing the long-term effect of  $\text{PM}_{2.5}$  on  
7 COVID-19 mortality. The aforementioned study in the US also assessed the effect of  $\text{PM}_{2.5}$  on  
8 COVID-19 mortality.<sup>9</sup> Their exposure model was previously validated having an  $R^2 = 0.89$   
9 for the annual estimates.<sup>26</sup> The evidence for  $\text{PM}_{2.5}$  was weak, namely 10·8% (-1·1-24·1%) per  
10  $3.4\mu\text{g}/\text{m}^3$  increase in  $\text{PM}_{2.5}$  concentration (that is approximately 3·2% increase per  $1\mu\text{g}/\text{m}^3$ )  
11 after adjusting for confounding and spatial autocorrelation. Our study comes in contrast with  
12 another study in the US that used deaths reported until April 22<sup>nd</sup>, 2020 and counties as the  
13 geographical unit.<sup>6</sup> For the exposure, they used previously validated monthly  $\text{PM}_{2.5}$   
14 concentrations ( $R^2 = 0.70$ )<sup>27</sup> and averaged them during 2000 and 2016. After adjusting for  
15 confounding but not for spatial autocorrelation, they found an 8% (2%-15%) increase in the  
16 COVID-19 death rate for an increase of  $1\mu\text{g}/\text{m}^3$  in  $\text{PM}_{2.5}$  concentration. Our study comes also  
17 in contrast with the study in the Netherlands that reported 2·3 (1·3-3·0) additional COVID-19  
18 deaths for an increase of  $1\mu\text{g}/\text{m}^3$  in the averaged long-term  $\text{PM}_{2.5}$  concentration.<sup>10</sup> Having a  
19 mean number of deaths equal to 16·86, the above estimate translates to a 13·6% increase in  
20 the COVID-19 mortality rate for an increase of  $1\mu\text{g}/\text{m}^3$  in  $\text{PM}_{2.5}$  concentration.

## 21 **Strengths and Limitations**

22 Our study is the first study that examines the association between long-term exposure to  $\text{NO}_2$   
23 and  $\text{PM}_{2.5}$  at very high geographical precision. The spatial unit of our analysis is LSOAs, for  
24 which there are 32 844 in England ( $\sim 130\,000\text{km}^2$ ), whereas previous studies have used 317  
25 LTLAs in England, counties in the US (3 122 in an area  $\sim 9.8$  million  $\text{km}^2$ ) and municipalities  
26 in the Netherlands (334 in an area  $\sim 41\,500\text{km}^2$ ). Such high-resolution allows capturing the

1 localised geographical patterns of the pollutants but also ensures adequate confounding and  
2 spatial autocorrelation adjustment. Our study also covers, so far, the largest temporal window  
3 of the epidemic (capturing the entire first wave, Figure S25 Supplementary Material), while  
4 most previous studies focused on the early to mid-stages of the first wave. This ensures better  
5 generalisability of the results. We also adjusted for spatial autocorrelation, which was found  
6 to be a crucial component in the model. Not accounting for spatial autocorrelation, when  
7 spatial autocorrelation is present, is expected to give rise to narrower credible intervals and  
8 false positive effects.<sup>28</sup>

9 Our study has also some limitations. The downscaling procedure will likely inflate the  
10 reported credible intervals. However, this naturally reflects the uncertainty of the place of  
11 residence resulted from the downscaling approach. Although we consider small areas, the  
12 study is still an ecological one and thus the reported effects do not reflect individual  
13 associations.<sup>12</sup> Case fatality might have been a more appropriate metric for the analysis, since  
14 disease spread is accounted for in the denominator. Nevertheless, given the asymptomatic  
15 infections and the fact that number of reported infections is not a random sample of the  
16 general population, the number of COVID-19 cases per LTLA is not reliable at this stage.  
17 However, part of the disease spread was captured in the spatial autocorrelation term. We did  
18 not account for population mobility during 2014-2018, and assumed constant residence and  
19 thus levels of exposure to air-pollution. We also could not account for non-residential air-  
20 pollution exposure.

## 21 **Interpretation**

22 Compared to the previous studies, our results are the smallest in magnitude, likely because of  
23 the high geographical precision that allows more accurate confounding and spatial  
24 autocorrelation adjustment. In addition, we report the weakest evidence of an effect, which  
25 could be due to lack of power and individual exposure data. Nevertheless, as for NO<sub>2</sub> we find  
26 a high posterior probability of an effect on mortality, we argue that a potential explanation

1 might be the mediation effect of pre-existing conditions. While in our analysis the inclusion of  
2 area-level prevalence of hypertension, diabetes and COPD did not change the results, the  
3 ecological nature of the pre-existing conditions data does not allow us to account for the  
4 mediation effect at the individual level. None of the previous studies have accounted for pre-  
5 existing conditions. Similarly, the weak, but positive, effect observed for PM<sub>2.5</sub> could be an  
6 attribute to pre-existing conditions, or even disease spread, as recent studies have suggested  
7 that PM<sub>2.5</sub> can proliferate COVID-19 transmission.<sup>29</sup>  
8 Our analysis captured strong spatial autocorrelation. The observed pattern could reflect  
9 residual variation from a potential inadequate covariate adjustment (including disease spread),  
10 spatial variation of pre-existing conditions, other unknown spatial confounders or a  
11 combination from all above. In a sensitivity analysis, we observed that the factors associated  
12 with disease transmission left the latent field unchanged (Supplementary Material Figure  
13 S17), as did the inclusion of hypertension, diabetes and COPD (Supplementary Material  
14 Figure S24). When we restricted the analysis to the pre-lockdown period, the latent field for  
15 both pollutants captured London and Birmingham, i.e. the cities with the first outbreaks.  
16 Considering the above, and the fact that COVID-19 is an infectious disease, we believe that  
17 large variation of Figure 4 is likely due to disease spread, which is not adequately captured in  
18 the disease progression covariates.

## 19 **Conclusion**

20 Overall, this study provides some evidence of an association between averaged exposure  
21 during 2014-2018 to NO<sub>2</sub> and COVID-19 mortality, while the role of PM<sub>2.5</sub> remains more  
22 uncertain.

## 23 **Contributors**

24 Conceptualisation: G.K., T.P., M.B.; Methodology: G.K., T.P., M.B.; Formal analysis: G.K.,  
25 T.P.; Validation: G.K., T.P., J.B., B.D., M.E., and M.B.; Writing-original draft: G.K.;

1 Writing-review and editing: G.K., T.P., J.B., B.D., M.E., and M.B.; Resources: G.K., M.B.,  
2 M.E.; Supervision: M.B. All authors read and approved the final manuscript.

### 3 **Declaration of interests**

4 We declare no competing interests.

### 5 **Ethical approval**

6 Only aggregated count data were used in this analysis; no individual data were used.

### 7 **Acknowledgements**

8 G.K. is supported by an MRC Skills Development Fellowship [MR/T025352/1]. M.B and T.P  
9 are supported by a National Institutes of Health, grant number [R01HD092580-01A1]. J.B.  
10 and M.E. are supported by the Pathways to Equitable Healthy Cities grant from the Wellcome  
11 Trust [209376/Z/17/Z] and by a grant from the US Environmental Protection Agency (EPA),  
12 as part of the Centre for Clean Air Climate Solution (assistance agreement no. R835873). This  
13 article has not been formally reviewed by the EPA. The views expressed in this document are  
14 solely those of the authors and do not necessarily reflect those of the EPA. The EPA does not  
15 endorse any products or commercial services mentioned in this publication.

16  
17

## 1 **References**

- 2 1. Hauser A, Counotte MJ, Margossian CC, et al. Estimation of SARS-CoV-2 mortality  
3 during the early stages of an epidemic: a modelling study in Hubei, China and northern Italy.  
4 *medRxiv* 2020.
- 5 2. Kontis V, Bennett JE, Parks RM, et al. Age-and sex-specific total mortality impacts of  
6 the early weeks of the Covid-19 pandemic in England and Wales: Application of a Bayesian  
7 model ensemble to mortality statistics. *medRxiv* 2020.
- 8 3. Wu Z, McGoogan JM. Characteristics of and Important Lessons From the Coronavirus  
9 Disease 2019 (COVID-19) Outbreak in China: Summary of a Report of 72 314 Cases From  
10 the Chinese Center for Disease Control and Prevention. *JAMA* 2020; **323**(13): 1239-42.
- 11 4. Williamson E, Walker AJ, Bhaskaran KJ, et al. OpenSAFELY: factors associated with  
12 COVID-19-related hospital death in the linked electronic health records of 17 million adult  
13 NHS patients. *MedRxiv* 2020.
- 14 5. Yang J, Zheng Y, Gou X, et al. Prevalence of comorbidities and its effects in patients  
15 infected with SARS-CoV-2: a systematic review and meta-analysis. *International Journal of*  
16 *Infectious Diseases* 2020; **94**: 91-5.
- 17 6. Wu X, Nethery RC, Sabath BM, Braun D, Dominici F. Exposure to air pollution and  
18 COVID-19 mortality in the United States. *medRxiv* 2020.
- 19 7. Giorgini P, Di Giosia P, Grassi D, Rubenfire M, D Brook R, Ferri C. Air pollution  
20 exposure and blood pressure: an updated review of the literature. *Current pharmaceutical*  
21 *design* 2016; **22**(1): 28-51.
- 22 8. Scheers H, Jacobs L, Casas L, Nemery B, Nawrot TS. Long-term exposure to  
23 particulate matter air pollution is a risk factor for stroke: meta-analytical evidence. *Stroke*  
24 2015; **46**(11): 3058-66.
- 25 9. Liang D, Shi L, Zhao J, et al. Urban Air Pollution May Enhance COVID-19 Case-  
26 Fatality and Mortality Rates in the United States. *medRxiv* 2020.

- 1 10. Cole M, Ozgen C, Strobl E. Air Pollution Exposure and COVID-19. 2020.
- 2 11. Travaglio M, Yu Y, Popovic R, Leal NS, Martins LM. Links between air pollution and  
3 COVID-19 in England. *medRxiv* 2020.
- 4 12. Wakefield J. Ecologic studies revisited. *Annu Rev Public Health* 2008; **29**: 75-90.
- 5 13. Andersen ZJ, Bønnelykke K, Hvidberg M, et al. Long-term exposure to air pollution  
6 and asthma hospitalisations in older adults: a cohort study. *Thorax* 2012; **67**(1): 6-11.
- 7 14. Balti EV, Echouffo-Tcheugui JB, Yako YY, Kengne AP. Air pollution and risk of  
8 type 2 diabetes mellitus: a systematic review and meta-analysis. *Diabetes research and*  
9 *clinical practice* 2014; **106**(2): 161-72.
- 10 15. Cai Y, Zhang B, Ke W, et al. Associations of short-term and long-term exposure to  
11 ambient air pollutants with hypertension: a systematic review and meta-analysis.  
12 *Hypertension* 2016; **68**(1): 62-70.
- 13 16. Zhang Z, Wang J, Lu W. Exposure to nitrogen dioxide and chronic obstructive  
14 pulmonary disease (COPD) in adults: a systematic review and meta-analysis. *Environmental*  
15 *Science and Pollution Research* 2018; **25**(15): 15133-45.
- 16 17. Ortiz A. Air Quality in Europe-2019 Report. *European Environment Agency,*  
17 *Luxembourg* 2019.
- 18 18. Brookes DS, John; Kent, Andrew; Whiting, Sally; Rose, Rebecca; Williams,Chris.  
19 Technical Report on UK Supplementary Assessment Under the Air Quality Directive  
20 (2008/50/EC), the Air Quality Framework Directive (96/62/EC) and Fourth Daughter  
21 Directive (2004/107/EC) for 2015. 2017.
- 22 19. Center for International Earth Science Information Network - CIESIN - Columbia  
23 University. Gridded Population of the World, Version 4 (GPWv4): Population Count,  
24 Revision 11. Palisades, NY: NASA Socioeconomic Data and Applications Center (SEDAC);  
25 2018.



- 1 20. Besag J, York J, Mollié A. Bayesian image restoration, with two applications in spatial  
2 statistics. *Annals of the institute of statistical mathematics* 1991; **43**(1): 1-20.
- 3 21. Simpson D, Rue H, Riebler A, Martins TG, Sørbye SH. Penalising model component  
4 complexity: A principled, practical approach to constructing priors. *Statistical science* 2017;  
5 **32**(1): 1-28.
- 6 22. Gómez-Rubio V, Bivand RS, Rue H. Bayesian model averaging with the integrated  
7 nested Laplace approximation. *Econometrics* 2020; **8**(2): 23.
- 8 23. Rue H, Martino S, Chopin N. Approximate Bayesian inference for latent Gaussian  
9 models by using integrated nested Laplace approximations. *Journal of the royal statistical*  
10 *society: Series b (statistical methodology)* 2009; **71**(2): 319-92.
- 11 24. Linton NM, Kobayashi T, Yang Y, et al. Incubation period and other epidemiological  
12 characteristics of 2019 novel coronavirus infections with right truncation: a statistical analysis  
13 of publicly available case data. *Journal of clinical medicine* 2020; **9**(2): 538.
- 14 25. Di Q, Amini H, Shi L, et al. Assessing NO<sub>2</sub> Concentration and Model Uncertainty  
15 with High Spatiotemporal Resolution across the Contiguous United States Using Ensemble  
16 Model Averaging. *Environmental science & technology* 2019; **54**(3): 1372-84.
- 17 26. Di Q, Amini H, Shi L, et al. An ensemble-based model of PM<sub>2.5</sub> concentration across  
18 the contiguous United States with high spatiotemporal resolution. *Environment international*  
19 2019; **130**: 104909.
- 20 27. Van Donkelaar A, Martin RV, Li C, Burnett RT. Regional estimates of chemical  
21 composition of fine particulate matter using a combined geoscience-statistical method with  
22 information from satellites, models, and monitors. *Environmental science & technology* 2019;  
23 **53**(5): 2595-611.
- 24 28. Lee D, Sarran C. Controlling for unmeasured confounding and spatial misalignment in  
25 long-term air pollution and health studies. *Environmetrics* 2015; **26**(7): 477-87.

1 29. Bianconi V, Bronzo P, Banach M, Sahebkar A, Mannarino MR, Pirro M. Particulate  
2 matter pollution and the COVID-19 outbreak: results from Italian regions and provinces.  
3 *Archives of Medical Science* 2020; **16**(1).

4

5

6

7

8

9

10

11

12

13

14

15

16

17

18

19

20

21

22 .

## 1 Tables

### 2 Table 1. Data sources used in the analysis

| Confounders                              | Source                                                                                                         | Spatial Resolution                  | Temporal Resolution         | Type                         |
|------------------------------------------|----------------------------------------------------------------------------------------------------------------|-------------------------------------|-----------------------------|------------------------------|
| Temperature                              | MetOffice<br><a href="https://www.metoffice.gov.uk/">https://www.metoffice.gov.uk/</a>                         | 1km <sup>2</sup>                    | Mar-June 2018               | continuous                   |
| Relative humidity                        | MetOffice<br><a href="https://www.metoffice.gov.uk/">https://www.metoffice.gov.uk/</a>                         | 1km <sup>2</sup>                    | Mar-June 2018               | continuous                   |
| Index of Multiple Deprivation            | Ministry of Housing, Communities and Local Government<br><a href="https://www.gov.uk/">https://www.gov.uk/</a> | Lower layer super output area       | 2011                        | rank (quintiles)             |
| Urbanicity                               | Office of National Statistics<br><a href="https://www.ons.gov.uk/">https://www.ons.gov.uk/</a>                 | Lower layer super output area       | 2011                        | urban/rural                  |
| Days since 1 <sup>st</sup> reported case | Public Health England                                                                                          | Lower tier local authority          | Until 30 <sup>th</sup> June | continuous                   |
| Number of positive cases                 | Public Health England                                                                                          | Lower tier local authority          | Until 30 <sup>th</sup> June | discrete (counts)            |
| Population density                       | Office of National Statistics<br><a href="https://www.ons.gov.uk/">https://www.ons.gov.uk/</a>                 | Lower layer super output area       | 2018                        | continuous (log transformed) |
| Number of intensive care unit beds       | National Health Service<br><a href="https://www.england.nhs.uk/">https://www.england.nhs.uk/</a>               | National Health Service trust       | February 2019               | continuous (per population)  |
| Smoking                                  | Public Health England<br><a href="https://fingertips.phe.org.uk/">https://fingertips.phe.org.uk/</a>           | General practitioner catchment area | 2018-2019                   | continuous (prevalence)      |
| Obesity                                  | Public Health England<br><a href="https://fingertips.phe.org.uk/">https://fingertips.phe.org.uk/</a>           | General practitioner catchment area | 2018-2019                   | continuous (prevalence)      |
| High Risk Occupation                     | Office of National Statistics<br><a href="https://www.ons.gov.uk/">https://www.ons.gov.uk/</a>                 | Middle layer super output area      | 2011                        | continuous (prevalence)      |

3

1 **Figures**

2 **Fig 1.** Flowchart of the COVID-19 deaths.

3 **Fig 2.** Population weighted exposure per LSOA.

4 **Fig 3.** Density strips for the posterior of COVID-19 mortality relative risk with  $1\mu\text{g}/\text{m}^3$

5 increase in  $\text{NO}_2$  (top panel) and  $\text{PM}_{2.5}$  (bottom panel) averaged long-term exposure.

6 **Fig 4.** Median posterior spatial relative risk (exponential of the spatial autocorrelation term)

7 and posterior probability that the spatial relative risk is larger than 1 for the models with  $\text{NO}_2$

8 and a spatial autocorrelation term and the fully adjusted  $\text{NO}_2$  model.

9

10

1 **Fig 1.**  
2

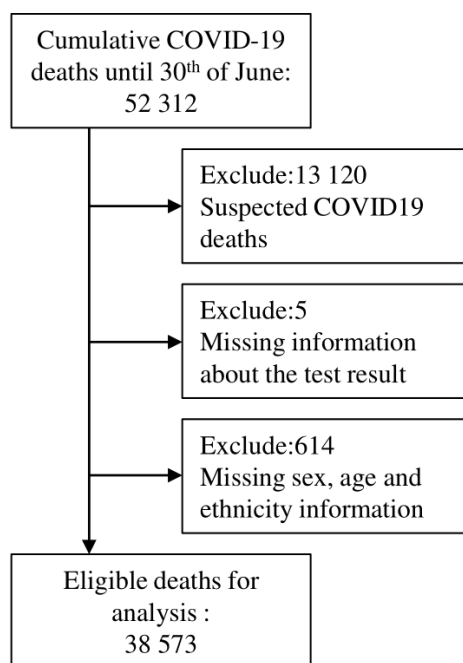

3  
4  
5  
6

1 **Fig 2.**  
2

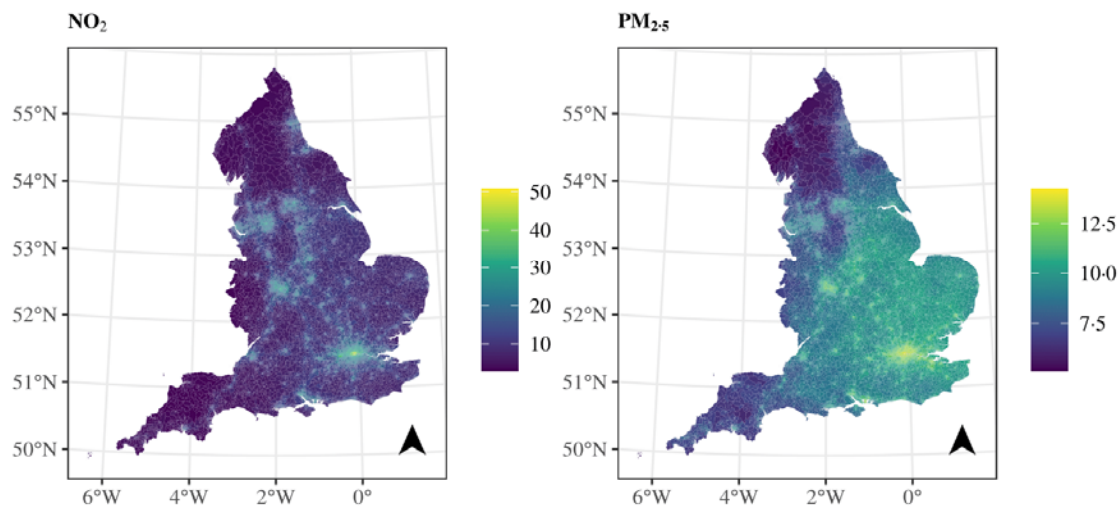

3  
4

1 **Fig 3.**

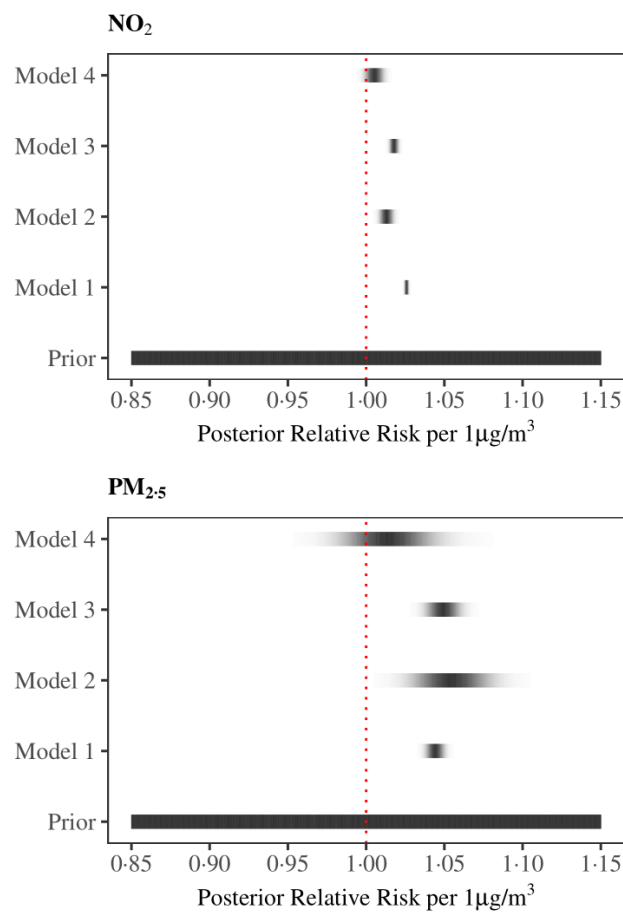

2  
3

1 **Fig 4.**

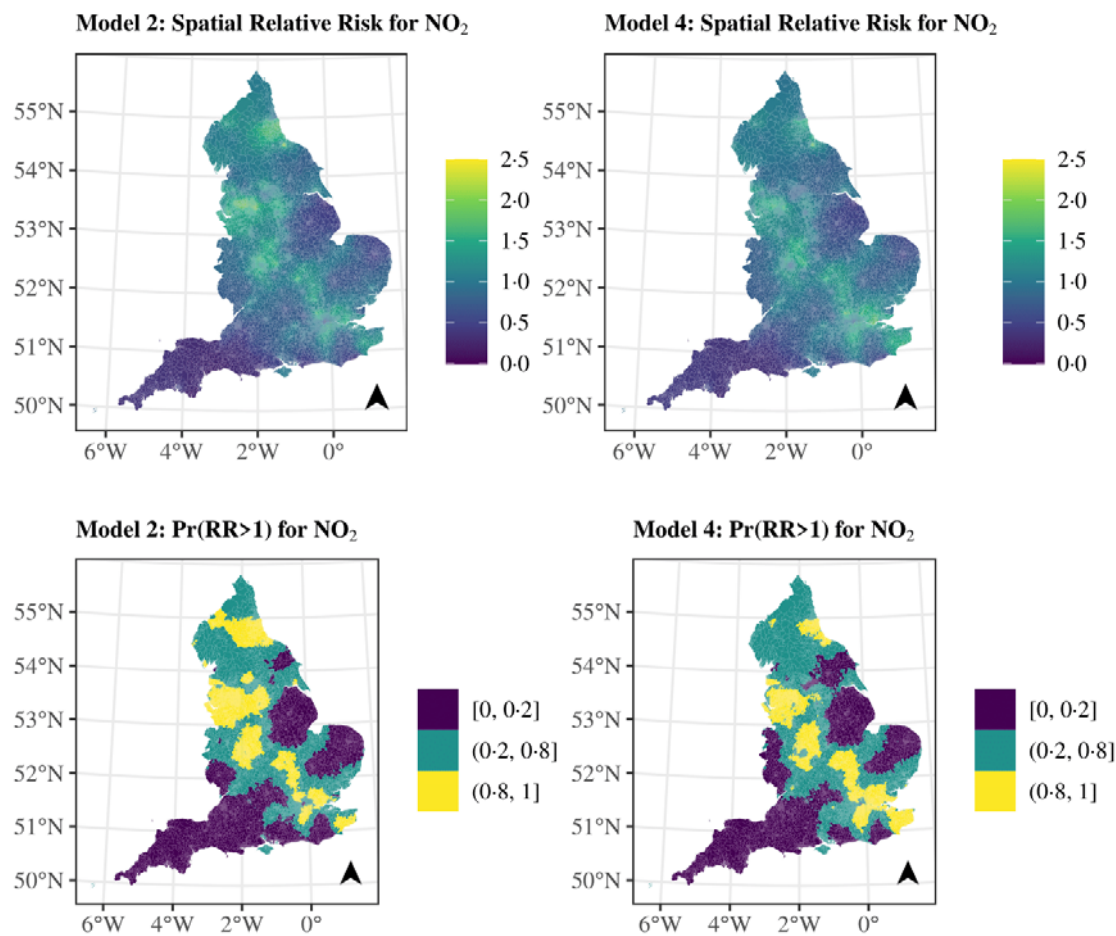

2
